# Supplementary material for: A Fe-doped Ni3S2particle film as a high-efficiency robust oxygen evolution electrode with very high current density
Source: Royal Society of Chemistry journal article supplement (doi:10.1039/c5ta06788j), 2015-01-01
Supplement: c5ta06788j1.pdf [file c5ta06788j1.pdf]

## Electronic Supplementary Information

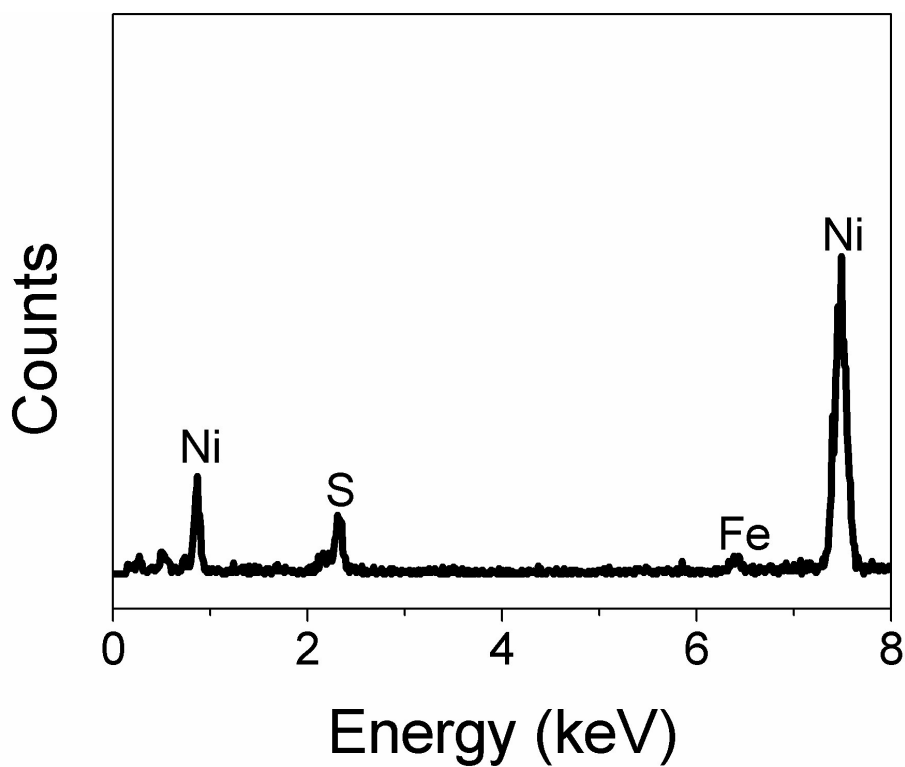

**Fig. S1** EDX spectrum of  $\text{Fe}_{11.8\%}\text{-Ni}_3\text{S}_2/\text{NF}$ .

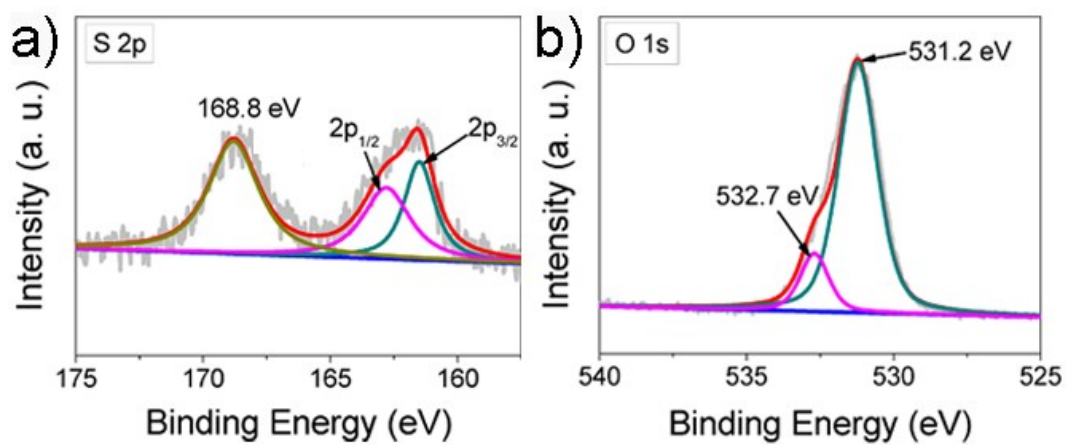

**Fig. S2** XPS spectra in (a) S 2p and (b) O 1s regions for Fe<sub>11.8%</sub>-Ni<sub>3</sub>S<sub>2</sub>/NF.

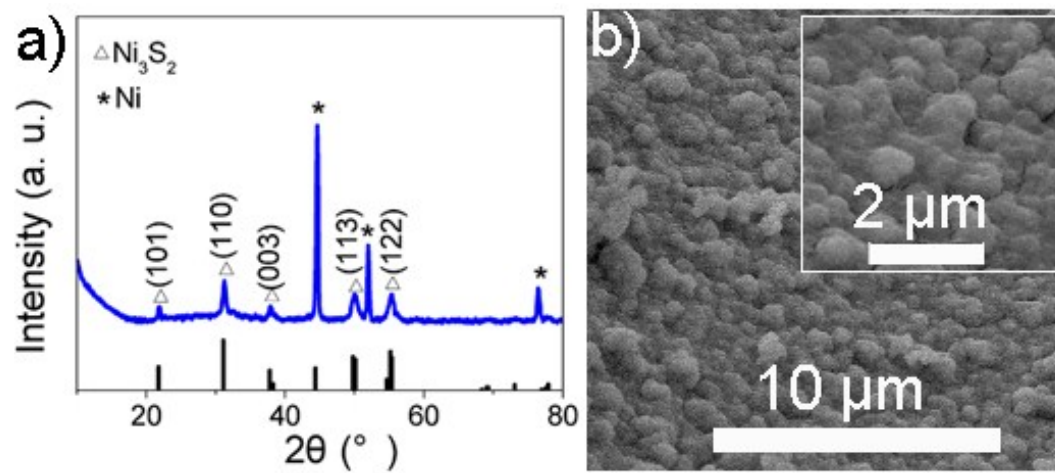

**Fig. S3** (a) XRD pattern and (b) SEM images of  $\text{Ni}_3\text{S}_2/\text{NF}$ .

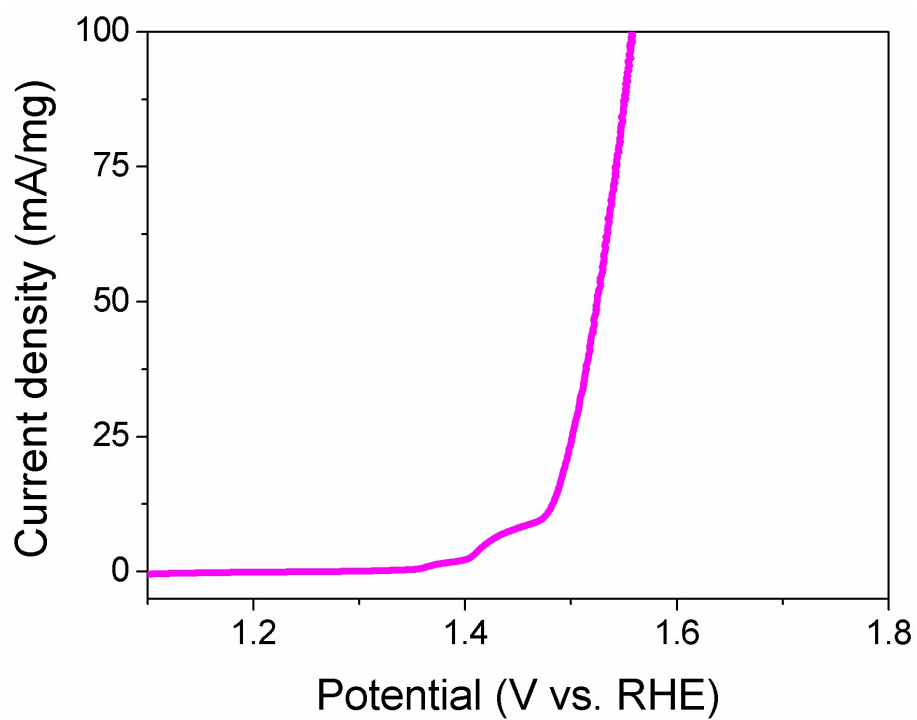

**Fig. S4** Polarization curve for Fe<sub>11.8%</sub>-Ni<sub>3</sub>S<sub>2</sub>/NF with a scan rate of 2 mV/s in 1 M KOH.

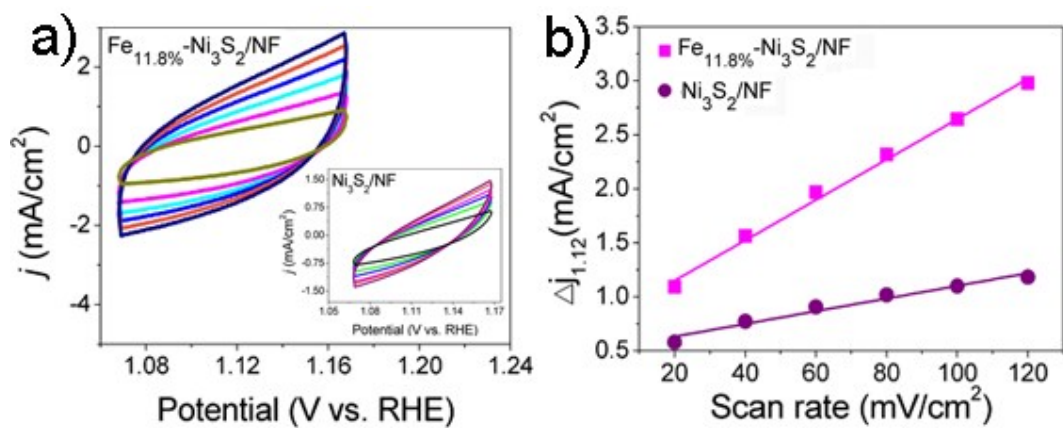

**Fig. S5** (a) CVs for Fe<sub>11.8%</sub>-Ni<sub>3</sub>S<sub>2</sub>/NF and Ni<sub>3</sub>S<sub>2</sub>/NF (inset) in 1 M KOH. (b) The capacitive current at 1.12 V as a function of scan rate for Fe<sub>11.8%</sub>-Ni<sub>3</sub>S<sub>2</sub>/NF and Ni<sub>3</sub>S<sub>2</sub>/NF ( $\Delta j = j_a - j_c$ ).

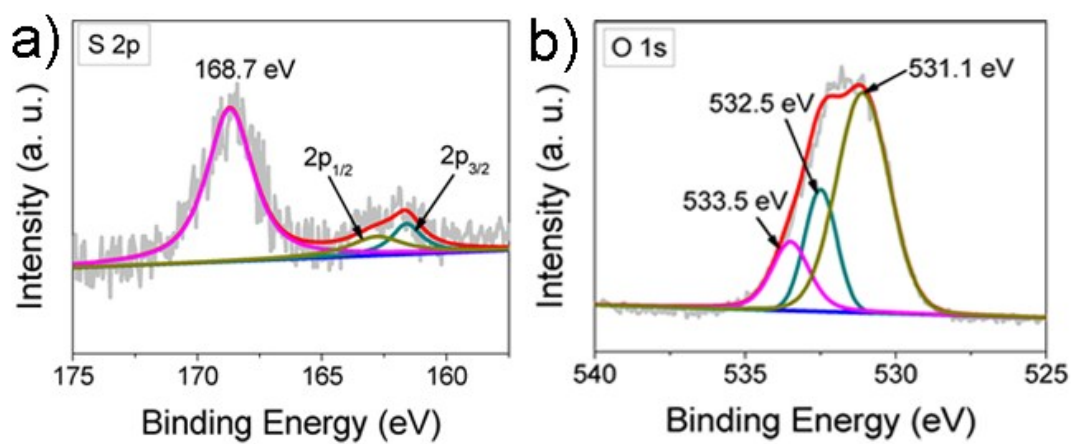

**Fig. S6** XPS spectra in (a) S 2p region and (b) O 1s regions of  $\text{Fe}_{11.8\%}\text{-Ni}_3\text{S}_2/\text{NF}$  after OER electrolysis.

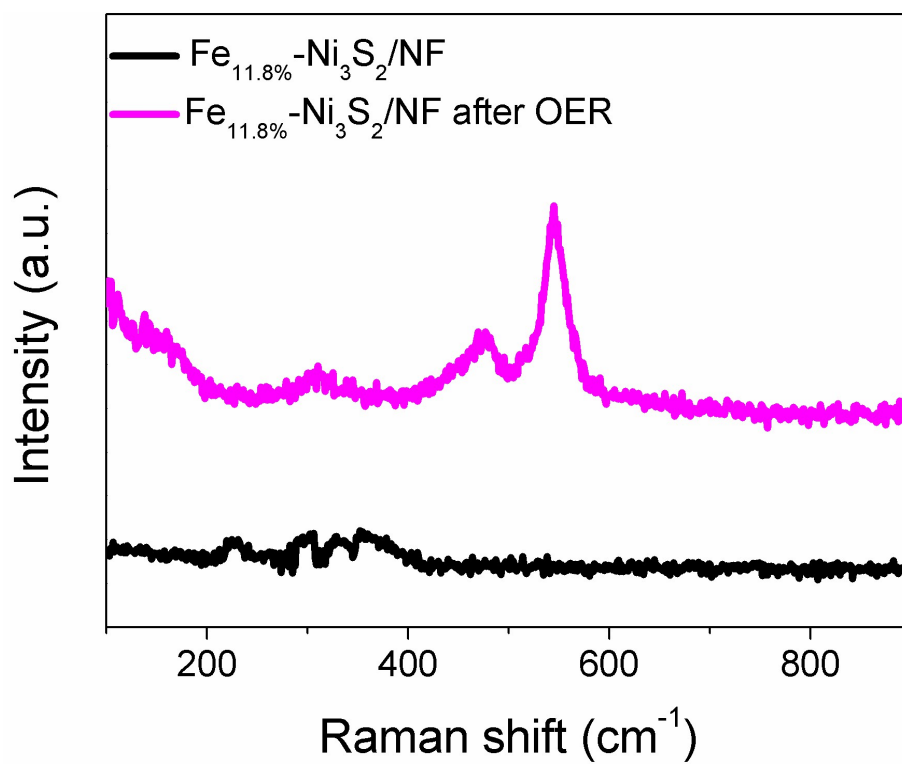

**Fig. S7** Raman spectra of Fe<sub>11.8%</sub>-Ni<sub>3</sub>S<sub>2</sub>/NF before and after OER electrolysis in 1.0 M KOH..

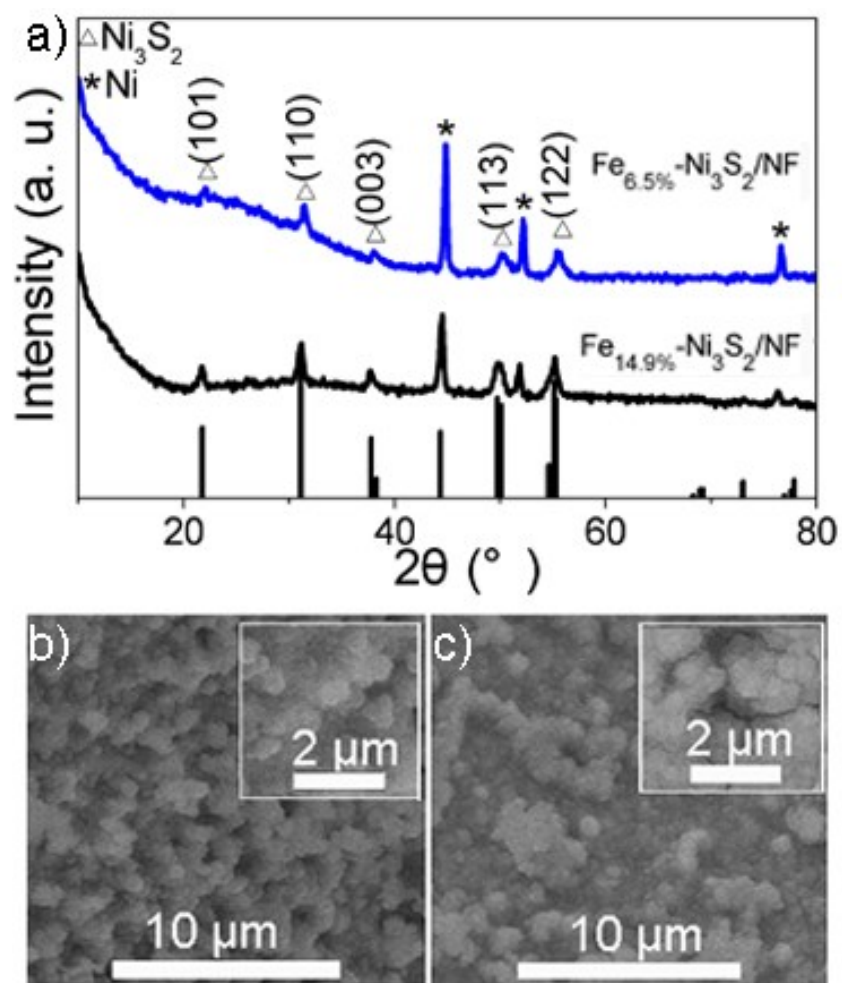

**Fig. S8** (a) XRD patterns of  $\text{Fe}_{6.5\%}\text{-Ni}_3\text{S}_2/\text{NF}$  and  $\text{Fe}_{14.9\%}\text{-Ni}_3\text{S}_2/\text{NF}$ . SEM images of (b)  $\text{Fe}_{6.5\%}\text{-Ni}_3\text{S}_2/\text{NF}$  and (c)  $\text{Fe}_{14.9\%}\text{-Ni}_3\text{S}_2/\text{NF}$ .



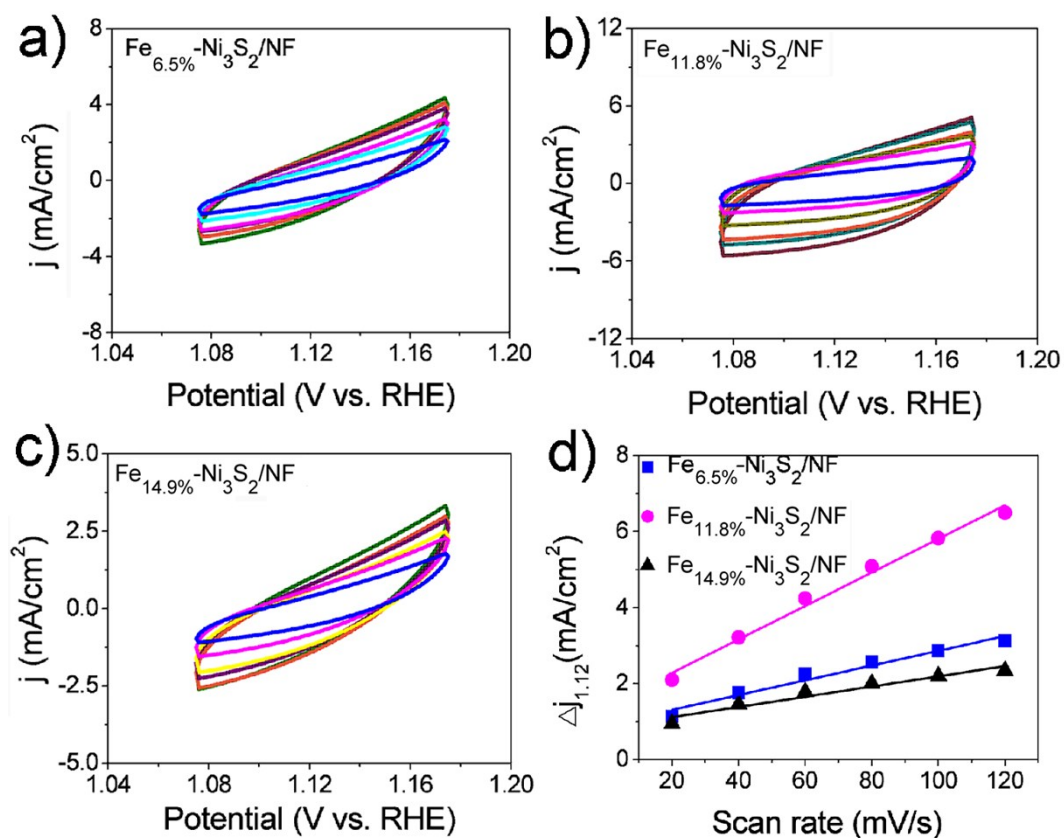

**Fig. S9** CVs for (a) Fe<sub>6.5%</sub>-Ni<sub>3</sub>S<sub>2</sub>/NF, (b) Fe<sub>11.8%</sub>-Ni<sub>3</sub>S<sub>2</sub>/NF, and (c) Fe<sub>14.9%</sub>-Ni<sub>3</sub>S<sub>2</sub>/NF in 30 wt% KOH. d) The capacitive currents at 1.12 V as a function of scan rate for Fe<sub>6.5%</sub>-Ni<sub>3</sub>S<sub>2</sub>/NF, Fe<sub>11.8%</sub>-Ni<sub>3</sub>S<sub>2</sub>/NF, and Fe<sub>14.9%</sub>-Ni<sub>3</sub>S<sub>2</sub>/NF ( $\Delta j = j_a - j_c$ ).
